1  
2  
3  
4  
5  
6  
7  
8  
9  
10  
11  
12  
13  
14  
15

The role of the components of PM<sub>2.5</sub> in the incidence of Alzheimer’s disease and related disorders

Haisu Zhang<sup>1</sup>, Yifan Wang<sup>1</sup>, Haomin Li<sup>1</sup>, Qiao Zhu<sup>1</sup>, Tszshan Ma<sup>1</sup>, Yang Liu<sup>1</sup>, Kyle Steenland<sup>1</sup>

<sup>1</sup> Rollins School of Public Health, Emory University

Keywords: Alzheimer’s, dementia, PM<sub>2.5</sub>, components

Words: 4218 text without abstract, reference, tables, or figures, 237 abstract

16 **Abstract**

17 Background: The associations of PM<sub>2.5</sub> mass and various adverse health outcomes have been widely  
18 investigated. However, fewer studies focused on the potential health impacts of PM<sub>2.5</sub> components,  
19 especially for dementia and Alzheimer’s diseases (AD).

20

21 Methods: We constructed a nationwide population-based open cohort study among Medicare beneficiaries  
22 aged 65 or older during 2000-2018. This dataset was linked with the predicted levels of 15 PM<sub>2.5</sub>  
23 components, including 5 major mass contributors (EC, OC, NH<sub>4</sub><sup>+</sup>, NO<sub>3</sub><sup>-</sup>, SO<sub>4</sub><sup>2-</sup>) and 10 trace elements (Br,  
24 Ca, Cu, Fe, K, Ni, Pb, Si, V, Zn) across contiguous US territory. Data were aggregated by ZIP code,  
25 calendar year and individual level demographics. Two mixture analysis methods, weighted quantile sum  
26 regression (WQS) and quantile g-computation (qgcomp), were used with quasi-Poisson models to analyze  
27 the health effects of the total mixture of PM<sub>2.5</sub> components on dementia and AD, as well as the relative  
28 contribution of individual components.

29

30 Results: Exposure to PM<sub>2.5</sub> components over the previous 5 years was significantly associated with  
31 increased risks of both dementia and AD, with stronger associations observed for AD. SO<sub>4</sub><sup>2-</sup>, OC, Cu were  
32 identified with large contributions to the combined positive association of the mixture from both WQS and  
33 qgcomp models.

34

35 Conclusion: We found positive associations between the 15 PM<sub>2.5</sub> components and the incidence of  
36 dementia and AD. Our findings suggest that reducing PM<sub>2.5</sub> emissions from traffic and fossil fuel  
37 combustion could help mitigate the growing burden of dementia and Alzheimer’s disease.

38

## 39 Introduction

40 In 2019, the estimated number of dementia patients worldwide exceeded 55 million, with societal costs  
41 surpassing 1,300 billion US dollars (1). In the United States alone, dementia affected more than 6.7 million  
42 Americans in 2023, and projections indicate 14 million cases by 2060 (2). Alzheimer's disease (AD) is the  
43 most common disease that leads to dementia and was the 6<sup>th</sup> leading cause of death in the United States (3).  
44 Given the absence of a cure for AD and related dementias (ADRD), a promising strategy to alleviate the  
45 health burden associated with these conditions is the identification and control of potential modifiable risk  
46 factors.

47

48 Growing evidence supports a relationship between air pollution and dementia, particularly regarding  
49 particulate matter with diameters less than 2.5 micrometers (PM<sub>2.5</sub>). Epidemiological studies conducted  
50 globally have consistently reported a positive association between long-term exposure to PM<sub>2.5</sub> mass and  
51 the risk of dementia (4-7).

52

53 The complex composition of PM<sub>2.5</sub> can benefit from a detailed examination, as the pathogenic effects of  
54 PM<sub>2.5</sub> are not precisely elucidated when treated as a whole. Health studies at the component level are  
55 needed to quantify the relative hazards of specific components, providing actionable recommendations to  
56 policymakers for targeted pollution control. Numerous investigations have revealed positive long-term and  
57 short-term associations between PM<sub>2.5</sub> components and various health outcomes, including non-accidental  
58 mortality (8-10), cardiovascular diseases (11, 12), and respiratory diseases (13, 14). However, few studies  
59 have investigated the health effects of PM<sub>2.5</sub> components on dementia using a mixture analysis approach.

60

61 Another important limitation of past studies on the health effects of PM<sub>2.5</sub> components is the lack of  
62 high-resolution exposure data. While some previous studies have relied on data from ground-based  
63 monitoring stations (15, 16), such data often fails capture the potentially greater spatial heterogeneity of  
64 some components comparing to PM<sub>2.5</sub> mass. Moreover, the relatively limited number of monitoring  
65 stations for specific PM<sub>2.5</sub> components has limited the scope of these studies. To cope with these  
66 challenges, many studies started to use data from exposure prediction models as an alternative (8, 11).  
67 Such models can achieve higher spatial resolution and good prediction accuracies, allowing for better  
68 estimation of their associations with adverse health outcomes.

69

70 A significant challenge in exploring potential relationships between PM<sub>2.5</sub> components and adverse health  
71 outcomes is the observed high correlation among different particle components, as documented in previous  
72 studies (15, 17, 18). Our previous study evaluated 5 major PM<sub>2.5</sub> components (EC, OC, NH<sub>4</sub><sup>+</sup>, NO<sub>3</sub><sup>-</sup>, SO<sub>4</sub><sup>2-</sup>)  
73 and showed positive associations with AD and ADRD through single pollutant models (19). Here, we  
74 extend that research to incorporate the high-resolution data of 15 PM<sub>2.5</sub> components and utilize two  
75 mixture analysis methods, which can control for component correlations: weighted quantile sum regression  
76 and quantile g-computation, to derive more robust and comprehensive estimates on the relative toxicity of  
77 these components.

78

## 79 **Methods**

### 80 **Study Population.**

81 Two nationwide, privacy-protected and publicly available databases from the Centers for Medicare and  
82 Medicaid Services (CMS), including the Medicare denominator file and the Medicare Chronic Conditions  
83 Warehouse (CCW), were analyzed in this study. The denominator file contains enrollment records for each  
84 Medicare beneficiary, including demographics, Medicaid insurance status (a proxy for SES), the date of  
85 death, and ZIP code of residence, which were updated annually. The CCW claims data include predefined  
86 indicators for chronic conditions, based on ICD codes from health care providers, among the  
87 fee-for-service (FFS) Medicare beneficiaries and provides the date of the first occurrence with a diagnosis  
88 code for a specific condition.

89

90 We constructed separate cohorts for all-cause dementia and AD with the records from 2000 to 2018. For  
91 each cohort, we further required a “clean” period of 5 years after enrollment, during which the eligible  
92 beneficiaries could not have diagnosis codes for dementia or AD. For example, a beneficiary entering  
93 Medicare in 2003 would be required to be dementia-free by 2008; and the follow-up would only begin in  
94 2008. The removal of potentially prevalent cases during the first 5 years of follow up was done to estimate  
95 incidence rather than prevalence effect measures. Overall, the study subjects entered the cohort on January  
96 1<sup>st</sup> of the year following the “clean” period and were followed until the first diagnosis of the outcome of  
97 interest, death, or end of follow-up.. All subjects were required to have continuous enrollment in Medicare  
98 Fee for Service for Parts A and B (doctors’ visits and hospitalizations) during follow-up to ensure  
99 consistent ascertainment of outcomes, as Medicare Advantage participants do not have data in the CCW  
100 file.

101

102 Our research is approved by Emory’s IRB (#STUDY00000316) and the Centers for Medicare & Medicaid  
103 Services (CMS) under the data use agreement (#RSCH-2020-55733). The Medicare dataset was stored and  
104 analyzed in Emory Rollins School secure cluster environment (HPC), with Health Insurance Portability  
105 and Accountability Act (HIPAA) compliance.

106

### 107 **Outcome classification**

108 There were two primary outcomes of interest in this study, all-cause dementia and AD. The diagnoses of  
109 dementia and AD were identified and recorded as two distinct indicators in the CCW dataset, which  
110 incorporated information across the available Medicare claims, including inpatient and outpatient claims,  
111 Carrier files (primarily doctor visits), skilled nursing facility, and home health-care claims. The accuracy of  
112 this algorithm has been proved in classifying diseases based on several validation studies (20, 21). The  
113 ICD codes associated with the two indicators were presented in Table S1. Patients who had dementia  
114 diagnoses followed by a later diagnosis of AD were considered to be incident AD cases at the time of their  
115 first dementia diagnosis.

116

### 117 **Exposure assessment**

118 15 PM<sub>2.5</sub> components were explored in this study, including 5 major mass contributors: elemental carbon  
119 (EC), organic carbon (OC), nitrate (NO<sub>3</sub><sup>-</sup>), ammonium (NH<sub>4</sub><sup>+</sup>), sulfate (SO<sub>4</sub><sup>2-</sup>), which will be referred to as  
120 “major components” afterwards, and 10 trace elements: zinc (Zn) vanadium (V), silicon (Si), lead (Pb),  
121 nickel (Ni), potassium (K), iron (Fe), copper (Cu), calcium (Ca), bromine (Br). The annual mean

122 predictions for the 15 PM<sub>2.5</sub> components was estimated across the contiguous U.S. at a 50 m \* 50 m spatial  
123 resolution in urban areas and a 1 km \* 1 km spatial resolution in non-urban areas from 2000 to 2018 using  
124 super-learning and ensemble weighted averaging models. Details about the PM<sub>2.5</sub> components dataset can  
125 be found elsewhere (22-24). Briefly, the training datasets consisted of data from 987 monitoring sites. 166  
126 predictors were used for the super-learning and ensemble weighted-averaging models, including time and  
127 geography information, satellite observation data, meteorological data, emitting/surrogate of emission  
128 sources and other variables. These approaches achieved excellent model performance, with cross-validated  
129 R-square for major components ranging from 0.856 (OM) to 0.957 (SO<sub>4</sub><sup>2-</sup>) and trace elements ranging  
130 from 0.79 (Cu) to 0.88 (Zn). This ensemble model approach has been applied on estimating PM<sub>2.5</sub> mass  
131 concentrations across the contiguous United States before and reached a cross-validated R-square of 0.89  
132 for annual predictions (25). The PM<sub>2.5</sub> components dataset and PM<sub>2.5</sub> mass dataset have been widely used  
133 in previous epidemiological studies (10, 19, 26).

134

135 The gridded predictions for each PM<sub>2.5</sub> component were then averaged at the ZIP code level with a  
136 population weighting approach. Within a ZIP code, the gridded population density value published on  
137 NASA SEDAC website were used as weights while calculating the spatial averages of PM<sub>2.5</sub> components  
138 estimates (27). The moving average of up to 5 years prior to each calendar year were calculated by ZIP  
139 code. The ZIP code level 5 year moving average of exposures were then assigned to each Medicare  
140 beneficiary for each year, based on their residential ZIP code annually.

141

## 142 **Covariates**

143 Demographic characteristics at the individual level, including age, gender, and race, as well as Medicaid  
144 insurance status, were sourced from the Medicare denominator file. The age of beneficiaries was  
145 categorized into 4 groups: 65-75, 75-85, 85-95, 95+. The analytical models also integrated covariates at the  
146 neighborhood level, encompassing ZIP code-based socio-economic status variables such as population  
147 density, median household income, the percentage of the Black population, the percentage of the  
148 population residing in rental housing or apartments, and the percentage of the population with less than a  
149 high school education. Additionally, county-level factors, including behavioral risk factors such as  
150 smoking prevalence and mean body mass index, health care capacity variables like the number of hospitals  
151 and active medical doctors per 1,000 people, and a geographical region indicator, were incorporated into  
152 the models. Comprehensive details and data sources for the covariates could be found in Shi et al. (2021)  
153 (7).

154

## 155 **Statistical analysis**

156 Our main analysis assessed the cumulative associations between 15 PM<sub>2.5</sub> components and two primary  
157 outcomes, all-cause dementia and AD using two approaches, weighted quantile sum (WQS) regression  
158 models and quantile g-computation (qgcomp) models, with quasi-Poisson link function to account for  
159 potential over-dispersion.

160 The WQS models employ a two-step methodology to analyze the collective impact of exposure to a  
161 mixture of pollutants. Firstly, WQS calculates a composite index, representing the pollutant mixture, by  
162 deriving a weighted sum of quantiles for each pollutant, with optimal weights estimated by via regression  
163 of the studied outcome on the composite index in a training data set. Subsequently, the WQS model  
164 estimates the combined association between the pollutant mixture and the outcome through a multivariate

165 regression model, utilizing the WQS term as the exposure metric. This approach provides a comprehensive  
166 understanding of the combined effects of multiple pollutants on a specific outcome, incorporating both the  
167 composition of the mixture and its impact (28). One of the limitations for WQS model is that it requires  
168 directional homogeneity assumption, which means that all the exposures should have same direction  
169 associations with the outcome or have null associations.

170

171 The qgcomp models were developed as an extension of WQS regression models. Compared to WQS  
172 models, the qgcomp models do not require directional homogeneity and can incorporate both positive and  
173 negative associations between individual components of the mixture and the outcome. Qgcomp models use  
174 a marginal structural model to estimate the effect of the mixture. The qgcomp models can consistently  
175 estimate the effects of the exposures when WQS regression might be biased or inconsistent, but may also  
176 yield similar estimates with WQS regressions with large samples when its assumptions hold (29). We  
177 utilized both WQS and qgcomp models to compare the output from both models and serve as a  
178 cross-validation.

179

180 Individual level data were aggregated by calendar year and ZIP code in WQS models due to limited  
181 computational capacity, while in qgcomp models, individual level covariates (age group, sex, race,  
182 Medicaid status) were also used in data aggregation to define a stratum for more precise model estimations.  
183 For WQS models, the individual level covariates listed above were converted into the proportion of  
184 variable categories in each stratum defined by calendar year and ZIP code.

185

186

187 For WQS, an index was estimated from ranking exposure concentrations in deciles. Then, the dataset was  
188 divided by 60:40 into the training dataset and validation dataset. 250 bootstrap samples were assigned for  
189 parameter estimation. For qgcomp models. We also converted exposure concentrations into deciles.  
190 “qgcomp.noboot” procedure was used to estimate the associations. Both WQS and qgcomp models utilized  
191 quasi-Poisson regression, which accounts for any over-dispersion of Poisson assumptions. The observed  
192 number of cases in each stratum defined above was the outcome, and the predictors were deciles of the  
193 components and covariates. All the neighborhood level covariates were included as linear terms in models  
194 unless specified otherwise.

195

196 Several sensitivity analyses were also conducted. We fitted single and multi-pollutant stratified Cox  
197 proportional hazard models with a generalized estimating equation (GEE) to compare the traditional  
198 models with the mixture models. Single pollutant models and multi-pollutant models were fitted using  
199 individual level data, stratified by age group, race, sex, and Medicaid status, and controlled for same  
200 covariates in WQS and qgcomp models. Besides the model types, we also explored the effect of movers in  
201 our study. Since beneficiaries might change their address during the follow-up period, utilizing the moving  
202 5-year average exposures on ZIP code level could introduce exposure misclassification. Thus, we restricted  
203 the study population to beneficiaries that never change their address during the follow-up period for  
204 mixture models. All analyses were conducted in R software, version 4.2.2. WQS regression models were  
205 run with “gWQS” package and qgcomp models were run with “qgcomp” package (30, 31). Statistical  
206 significance was determined by two-sided  $P < 0.05$ .

207

## 208 **Results**

### 209 **Study Population**

210 Summary statistics of the dementia cohort and AD cohort can be found in Table S1. There were  
211 approximately 33.7 million beneficiaries in the dementia cohort and 34.6 million beneficiaries in the AD  
212 cohort. About 8.4 million (25.0%) individuals developed dementia and 3.8 million (11.1%) individuals  
213 developed AD. Most of the individuals in both cohorts were female (~57%), White (~88%), and not  
214 eligible for Medicaid insurance (~90%). Fig 1. shows the county-level incidence of dementia and AD per  
215 100,000 Medicare beneficiaries in United States from 2000 to 2018. A relatively higher incidence of both  
216 dementia and AD was observed in the South and Southeast US.

217

### 218 **Air pollution levels**

219 The annual mean PM<sub>2.5</sub> mass concentration (available during 2000-2016) was 9.87 µg/m<sup>3</sup>, which was  
220 lower than the EPA primary standard level, 12.0 µg/m<sup>3</sup>, with an interquartile range (IQR) of 4.18 µg/m<sup>3</sup>.  
221 The mean concentrations of PM<sub>2.5</sub> components are listed in Table 2. SO<sub>4</sub><sup>2-</sup> and OC contributed the most  
222 towards the PM<sub>2.5</sub> mass with mean concentrations of 1.80 µg/m<sup>3</sup> and 1.56 µg/m<sup>3</sup> respectively. Among trace  
223 elements, Si, Fe, Ca contributed the most, with mean concentrations at 93.01, 49.84, 41.54 pg/m<sup>3</sup>,  
224 respectively. Figure S2 shows the correlation matrix across all 15 PM<sub>2.5</sub> components. The absolute values  
225 of correlation coefficients between PM<sub>2.5</sub> components ranged from 0.01 to 0.88. Several PM<sub>2.5</sub> components  
226 were highly correlated, such as Cu and EC (correlation coefficient r = 0.80), NH<sub>4</sub><sup>+</sup> and SO<sub>4</sub><sup>2-</sup> (r = 0.88), Pb  
227 and Zn (r = 0.76).

228

### 229 **Qgcomp and WQS models on 15 PM<sub>2.5</sub> components**

230 The cumulative association between PM<sub>2.5</sub> components and dementia/AD were summarized in Table 3.  
231 From the qgcomp models, the rate ratio for dementia was 1.027 (95% CI: 1.025-1.028, per 1 decile  
232 increase in all PM<sub>2.5</sub> components), while AD showed stronger associations with a rate ratio of 1.041 (95%  
233 CI: 1.039-1.042). Similar but slightly smaller estimates were obtained from WQS models, with the rate  
234 ratio for dementia at 1.029 (95% CI: 1.028, 1.030) and AD at 1.048 (95% CI: 1.047, 1.049) per 1 decile  
235 increase in all PM<sub>2.5</sub> components.

236

237 The weights of each PM<sub>2.5</sub> component contributing to the associations for dementia and AD in qgcomp and  
238 WQS models were shown in Figure 2 and 3, respectively. Cu, SO<sub>4</sub><sup>2-</sup>, and OC were among the highest  
239 weights for both dementia and AD in both qgcomp and WQS models. In addition, qgcomp model  
240 identified Fe for AD and Zn for dementia with relatively large positive weights; WQS model identified Ni  
241 for dementia for relatively large weights. The weights of other components were very small and negligible.

242

### 243 **Total PM<sub>2.5</sub> mass and single component cox model**

244 The total PM<sub>2.5</sub> mass and single PM<sub>2.5</sub> component results are presented in Figure S4 and Table S3. PM<sub>2.5</sub>  
245 components with highest weights in mixture models also showed relatively strong association in single  
246 pollutant models. The hazard ratios of dementia with per IQR increase in PM<sub>2.5</sub> components were 1.057  
247 (95% CI: 1.052, 1.062) for Cu, 1.086 (95% CI: 1.081, 1.091) for SO<sub>4</sub><sup>2-</sup>, and 1.042 (95% CI: 1.037, 1.047)  
248 for OC. Similar but stronger associations were found for AD with HRs of 1.073 (95% CI: 1.067, 1.080) for  
249 Cu, 1.099 (95% CI: 1.091, 1.107) for SO<sub>4</sub><sup>2-</sup>, 1.066 (95% CI: 1.059, 1.074) for OC.

250

251 For Zn, we observed higher HR = 1.052 (95% CI: 1.048, 1.055) for dementia but smaller HR for AD  
252 (1.043, 95% CI: 1.038, 1.048), which was similar to the results in mixture models that Zn had relatively  
253 large weight for dementia but much smaller for AD. For Fe, we observed HR = 1.033 (95% CI: 1.028,  
254 1.038) for dementia, and 1.051 (95% CI: 1.045, 1.057) for AD, which also matched with the higher  
255 weights for AD identified in qgcomp models.

256

257 Additionally, the single pollutant models identified EC (HR = 1.065, 95% CI: 1.060, 1.071),  $\text{NH}_4^+$  (HR =  
258 1.060, 95% CI: 1.055, 1.065), Br (HR = 1.042, 95% CI: 1.037, 1.047) with relatively strong association  
259 with dementia. Similar associations were observed for AD and such associations were stronger for EC and  
260 Br, but slightly weaker for  $\text{NH}_4^+$ .

261

## 262 **Sensitivity analysis**

263

264 The sensitivity analyses results were presented in Table s6. When restricting the study population to  
265 non-movers, the estimated rate ratio per deciles was 1.022 (95% CI: 1.020, 1.023) for dementia and 1.036  
266 (95% CI: 1.034, 1.038) for AD in qgcomp models. Both estimates were slightly smaller than those from  
267 the full study population. The weights under non-mover scenario were presented in Figure s6. Compared to  
268 the main results,  $\text{SO}_4^{2-}$  still has the largest weights, while the weight for Cu decreased in qgcomp models  
269 for dementia. Additionally, the weights of Fe increased in qgcomp models, and WQS models identified Fe  
270 as significant contributor for dementia.

271

272 When changing the exposure window from 5 years to 3 years, the estimated rate ratio almost did not  
273 change. The weights under 3-year exposure window were presented in figure s7. For weights in qgcomp  
274 models,  $\text{SO}_4^{2-}$  and Cu remained the highest contributors, while the weights of other components varied  
275 slightly. The weights of OC decreased but still positively contributed to the total effect. The weights in  
276 WQS models almost did not change.

277

## 278 **Discussion**

279 In this study, we found positive cumulative associations between the  $\text{PM}_{2.5}$  components and both dementia  
280 and AD in mixture analyses. Such positive associations persist across different modeling approaches and  
281 specifications. The associations for AD were generally stronger than those for dementia. In both WQS and  
282 qgcomp models,  $\text{SO}_4^{2-}$ , Cu and OC were identified as the main contributors to both dementia and  
283 Alzheimer's disease. Those three components also showed positive associations in both single and  
284 multi-pollutant Cox models and remained as important contributors under most of the sensitivity analysis  
285 scenarios.

286

287 The positive cumulative associations between  $\text{PM}_{2.5}$  components and both AD and dementia are consistent  
288 with findings from our previous study on the Medicare beneficiaries, which utilized  $\text{PM}_{2.5}$  mass as the  
289 primary exposure, and many other epidemiological studies (7, 32-34). The relatively weaker associations  
290 for dementia compared to AD might result from the broader spectrum of different mental disorders of  
291 dementia. Some of the non-AD disorders under dementia might have weaker association with  $\text{PM}_{2.5}$

292 exposures (35). The magnitude of the cumulative associations was much higher when converted to per IQR  
293 increase in all components compared to that for total PM<sub>2.5</sub> mass. Such differences could be due to the  
294 temporal and spatial variations in the composition of PM<sub>2.5</sub>. When the PM<sub>2.5</sub> mass level changes, different  
295 components might not change in the same magnitude, potentially resulting in less overall health effects.

296

297 Cu, SO<sub>4</sub><sup>2-</sup> and OC were characterized as the most important contributing factors to incidence of AD and  
298 dementia among all the 15 PM<sub>2.5</sub> components. Such results were also supported by the single pollutant cox  
299 models. It is well-established that PM<sub>2.5</sub> is small enough to be absorbed into blood circulation through  
300 inhalation, and can penetrate the blood-brain barrier (BBB) (36), which indicates that the components in  
301 the PM<sub>2.5</sub> mixture could potentially participate in the metabolism of the nervous system. SO<sub>4</sub><sup>2-</sup> and organic  
302 carbon are two major PM<sub>2.5</sub> components that contribute to large fractions in PM<sub>2.5</sub> mass. The primary  
303 sources of SO<sub>4</sub><sup>2-</sup> include fossil fuel combustion, industrial process and the fertilizers used in agriculture (37,  
304 38). While there are not many studies reporting the effect of SO<sub>4</sub><sup>2-</sup> exposure on nervous system, SO<sub>4</sub><sup>2-</sup>  
305 could serve as a proxy for fossil fuel combustion or industrial related emission sources. Such sources  
306 produce volatile organic compounds (VOC) which could cause oxidative stress and neuroinflammation  
307 (39), and further contribute to AD and dementia.

308

309 In terms of OC, the exact compound and the emission sources were more complex. OC could be  
310 categorized into primary OC, which is mainly produced by vehicle emissions, industrial processes and  
311 wildfires, etc., and secondary OC, which is formed through chemical reactions involving VOCs (40). The  
312 neurotoxicity of different compounds in OC could differ a lot. For example, PAHs and PCBs in OC are  
313 highly toxic (41, 42). More research on the health effects of OC on nervous systems are warranted.

314

315 Cu along with Zn and Fe that were identified by qgcomp models are trace elements in PM<sub>2.5</sub> mixtures.  
316 Although trace elements only account for a small part in PM<sub>2.5</sub> mixtures, they could still have important  
317 health impacts. Previous research has shown that Cu could play an important role in the development and  
318 progression of neurodegenerative diseases (43). Excessive exposure to Cu could result in the dysregulation  
319 of Cu homeostasis in brain tissues (44). Cu overload can cause oxidative stress which could further cause  
320 damage to brain cells (45). Fe is an essential cofactor for many proteins in brain, however, various studies  
321 have shown that the abnormally high concentrations of Fe in some brain tissues were associated with  
322 neurodegenerative disorders (46, 47). Elevated Fe levels in brain could contribute to β-amyloid (Aβ)  
323 dysfunction, formation of plaque, the hyperphosphorylation of tau protein, and neuronal cell death which  
324 are the classical features in the pathology of AD (48-50). Zn is also an important element in neurons.  
325 Disruptions to Zn homeostasis has been associated with multiple nervous system disorders such as AD and  
326 Parkinson's disease (51). Elevated Zn levels in brain tissue could also lead to the deposition of Aβ and  
327 overly phosphorylated tau protein, which contributed to AD (52, 53). Considering the plausible adverse  
328 health effects of Cu, Zn and Fe on AD and dementia, policies targeting the related emission sources are  
329 vital. For example, non-tailpipe emissions from brake and tire wear are significant contributors to the metal  
330 components in particulate matter, including Cu, Zn and Fe (54, 55). With the implementation of mobile  
331 source regulations and the growing adoption of electric vehicles (EVs), significant reductions in tailpipe  
332 emissions have been achieved, and the relative contribution of non-tailpipe emissions has been increasing  
333 (56). Targeting the non-tailpipe emissions, EPA has introduced the Copper-free Brake Initiative since 2015  
334 (57), and we call for more effort in the reduction of non-tailpipe emissions.

335

336 While the epidemiological association between PM<sub>2.5</sub> mass and dementia has been extensively studied,  
337 there are not many studies looking into the component-specific associations, especially with the mixture  
338 analysis techniques. Our previous study revealed the potential effects of SO<sub>4</sub><sup>2-</sup> and black carbon (BC) on  
339 dementia with traditional cox models (19). More studies that focus on the PM<sub>2.5</sub> components or PM<sub>2.5</sub>  
340 sources are warranted to better elucidate the health effects of different components in PM<sub>2.5</sub> mixtures and  
341 contribute to targeted policies on PM<sub>2.5</sub> sources.

342

343 There are several strengths in our study. First, our study utilized nationwide, population-based open cohort  
344 constructed from the Medicare database to explore the potential health effects of PM<sub>2.5</sub> mixtures on  
345 dementia and AD. The large sample size provided us with strong power to identify the potential health  
346 effects. Second, we used mixture analysis techniques, qgcomp and WQS, to avoid the biases derived from  
347 collinearity in multi-pollutant models and address the issue of confounding from other PM<sub>2.5</sub> components  
348 in single pollutant models. By comparing the results from mixture analysis methods and traditional  
349 methods, our study could provide a more solid insight of the associations between PM<sub>2.5</sub> components and  
350 dementia. Third, our study used comprehensive Medicare claims with physician visits included, which  
351 could better capture the earlier diagnosed cases. Compared to other studies that used hospitalization  
352 records, our study could better identify incident cases.

353

354 There are also several limitations in our study. First, we used predicted PM<sub>2.5</sub> components concentrations  
355 from machine learning models. Though the model performance was excellent, potential prediction errors  
356 still exists. Meanwhile, the linkage of exposure to Medicare beneficiaries was conducted on ZIP code level  
357 since we only had the residential ZIP code of each beneficiary enrolled in Medicare. Although we have  
358 used population-weighted exposures within each ZIP code, some exposure misclassification is inevitable.  
359 Second, the qgcomp and WQS models were quantile-based models, and the overall estimates are based on  
360 each PM<sub>2.5</sub> component increase by the same quantile. However, in real-life situations, different PM<sub>2.5</sub>  
361 components rarely change in similar ways, which makes the overall estimates harder to interpret.  
362 Meanwhile, we did not account for the interactions among different components nor non-linear functions  
363 of the components. Finally, we did not account for the potential outcome misclassification in this study.  
364 Since the progression of dementia and AD is a long process, the identification of incident cases was still  
365 challenging although we have used comprehensive claims and a 5-year clean period. Misdiagnoses of AD  
366 and other dementia has been reported among Medicare beneficiaries before (21). Potential  
367 misclassification of AD outcome in Medicare was investigated via two different methods in our previous  
368 study on the health effects of PM<sub>2.5</sub> mass on AD and dementia, and revealed that such outcome  
369 misclassification would like to lead to some modest under-estimation of the true hazard ratios (7)..

370

## 371 **Conclusion**

372 Our study revealed a strong positive association between the PM<sub>2.5</sub> components mixture with both  
373 dementia and Alzheimer's diseases. Cu, SO<sub>4</sub><sup>2-</sup> and OC were identified as potentially more important  
374 contributors among the 15 PM<sub>2.5</sub> components. Our findings suggested that policies that target the reduction  
375 of ambient PM<sub>2.5</sub> concentrations should continue to be implemented to reduce the burden of dementia and  
376 Alzheimer's diseases in US. Our findings suggest that reducing PM<sub>2.5</sub> emissions from traffic and fossil fuel  
377 combustion could help mitigate the growing burden of dementia and Alzheimer's disease.

378  
379

## 380 Acknowledgements

381 This study was supported by the National Institute on Aging (NIA/NIH R01 AG074357).

382  
383

384 Table 1: Descriptive statistics of the study population and area-level covariates among the dementia cohort  
385 and Alzheimer’s disease (AD) cohort

|                       | Alzheimer’s Diseases |        | Dementia    |        |
|-----------------------|----------------------|--------|-------------|--------|
| Number of cases       | 2,997,902            | (10.8) | 6,801,584   | (25.4) |
| Number of patients    | 27,763,593           |        | 26,745,676  |        |
| Total person-years    | 178,701,891          |        | 166,689,100 |        |
| Age at entry          | 75.4                 | (5.6)  | 75.2        | (5.4)  |
| Sex                   |                      |        |             |        |
| Male                  | 11,676,349           | (42.1) | 11,302,092  | (42.3) |
| Female                | 16,087,244           | (57.9) | 15,443,584  | (57.7) |
| Race                  |                      |        |             |        |
| White                 | 24,768,655           | (89.2) | 23,891,902  | (89.3) |
| Black                 | 1,861,196            | (6.7)  | 1,765,910   | (6.6)  |
| Others                | 1,133,742            | (4.1)  | 1,087,864   | (4.1)  |
| Dual eligibility (PY) | 19,347,604           | (10.8) | 16,136,507  | (9.7)  |

386  
387

Table 2: Summary statistics of PM<sub>2.5</sub> component concentrations across study period

| Pollutants                            | IQR   | Mean  | SD    | 25th  | Median | 75th   | 95th   | Max    |
|---------------------------------------|-------|-------|-------|-------|--------|--------|--------|--------|
| EC (ug/m3)                            | 0.31  | 0.44  | 0.26  | 0.26  | 0.36   | 0.57   | 0.94   | 2.33   |
| NH <sub>4</sub> <sup>+</sup> (ug/m3)  | 0.65  | 0.73  | 0.45  | 0.37  | 0.63   | 1.02   | 1.60   | 2.84   |
| NO <sub>3</sub> <sup>-</sup> (ug/m3)  | 0.71  | 0.92  | 0.56  | 0.50  | 0.77   | 1.22   | 2.00   | 4.83   |
| OC (ug/m3)                            | 0.75  | 1.56  | 0.64  | 1.12  | 1.44   | 1.87   | 2.75   | 7.14   |
| SO <sub>4</sub> <sup>2-</sup> (ug/m3) | 1.48  | 1.80  | 1.07  | 0.98  | 1.53   | 2.45   | 3.99   | 6.47   |
| Br (pg/m3)                            | 1.18  | 2.22  | 0.83  | 1.63  | 2.21   | 2.81   | 3.59   | 8.09   |
| Ca (pg/m3)                            | 27.67 | 41.54 | 25.66 | 24.59 | 34.61  | 52.26  | 86.72  | 326.35 |
| Cu (pg/m3)                            | 1.96  | 1.88  | 1.66  | 0.69  | 1.23   | 2.65   | 5.39   | 17.73  |
| Fe (pg/m3)                            | 31.98 | 49.84 | 28.43 | 30.59 | 42.39  | 62.57  | 106.99 | 241.28 |
| K (pg/m3)                             | 18.20 | 51.62 | 15.42 | 41.94 | 50.65  | 60.15  | 76.77  | 232.27 |
| Ni (pg/m3)                            | 0.53  | 0.45  | 0.49  | 0.11  | 0.33   | 0.63   | 1.26   | 6.23   |
| Pb (pg/m3)                            | 1.45  | 2.05  | 1.29  | 1.16  | 1.62   | 2.61   | 4.82   | 9.72   |
| Si (pg/m3)                            | 63.28 | 93.01 | 53.02 | 55.55 | 80.30  | 118.83 | 187.00 | 581.00 |
| V (pg/m3)                             | 0.59  | 0.61  | 0.73  | 0.17  | 0.35   | 0.76   | 2.15   | 9.33   |
| Zn (pg/m3)                            | 4.30  | 6.78  | 3.89  | 4.22  | 5.92   | 8.51   | 13.87  | 46.59  |
| Total PM <sub>2.5</sub> mass (ug/m3)  | 4.18  | 9.87  | 3.17  | 7.76  | 9.76   | 11.94  | 15.10  | 30.92  |

388 Note: PM<sub>2.5</sub> mass concentrations are available from 2000 to 2016. Abbreviations: IQR: interquartile range.  
389 SD: Standard deviation. 25<sup>th</sup>: 25<sup>th</sup> percentile. 75<sup>th</sup>: 75<sup>th</sup> percentile. 95<sup>th</sup>: 95<sup>th</sup> percentile. SO<sub>4</sub><sup>2-</sup>: sulfate; NO<sub>3</sub><sup>-</sup>:

390 nitrate;  $\text{NH}_4^+$ : ammonium; OC: organic carbon; EC: elemental carbon; Zn: zinc; V or vanadium; K:  
391 potassium; Si: silicon; Pb: lead; Ni: nickel; Fe: iron; Cu: copper; Ca: calcium; Br: bromine

392

393 Table 3: Cumulative associations between  $\text{PM}_{2.5}$  components and Alzheimer's diseases / dementia in rate  
394 ratios estimated from both WQS and qgcomp models.

|                      | WQS                  | qgcomp               |
|----------------------|----------------------|----------------------|
| Dementia             | 1.029 (1.028, 1.030) | 1.027 (1.025, 1.028) |
| Alzheimer's diseases | 1.048 (1.047, 1.049) | 1.041 (1.039, 1.042) |

395 Note: The rate ratios are estimated with 1 decile increase in all  $\text{PM}_{2.5}$  components.

396

397 Figure 1: Distribution of Dementia / Alzheimer's disease per 100000 person-yr by ZIP code across the  
398 contiguous U.S.

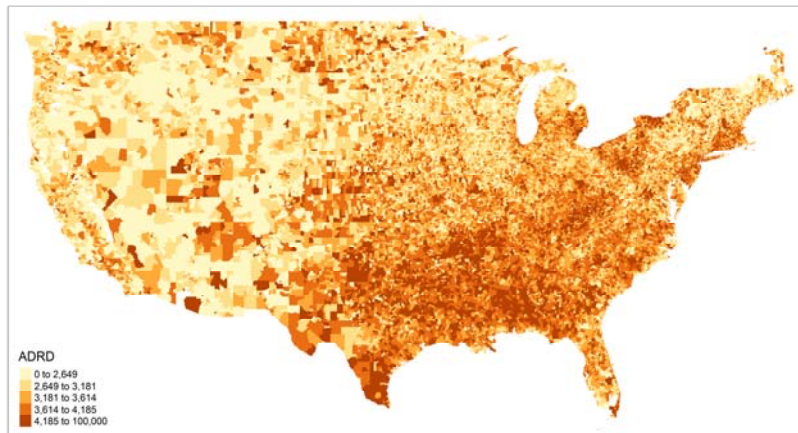

399

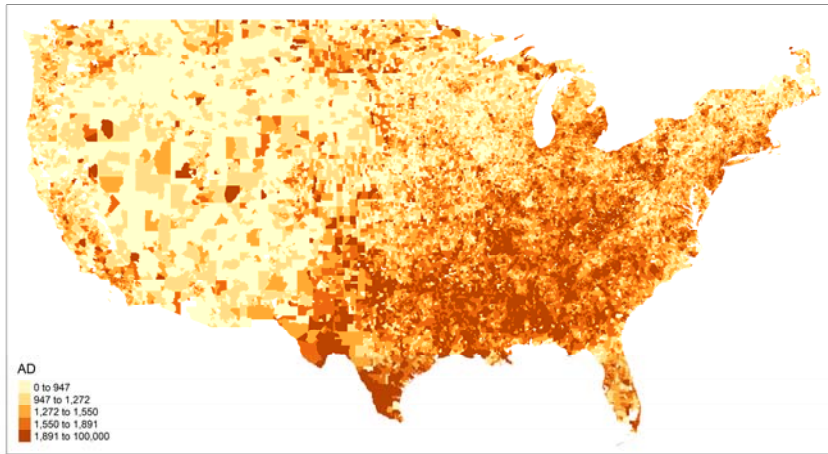

400

401 Figure 2: The weights assigned to each PM<sub>2.5</sub> component from qgcomp models.

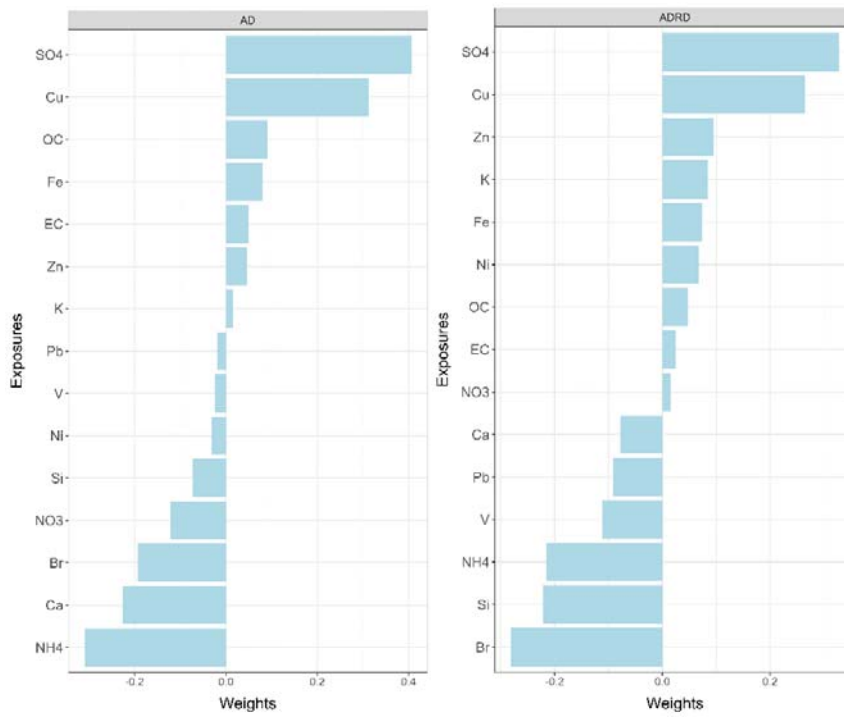

402

**AD**

**ADRD**

403

404 Figure 3: The weights assigned to each PM<sub>2.5</sub> component from WQS models. Red dashed line marks the  
405 value of 1/15, which is the threshold for identifying significant contributor among all PM<sub>2.5</sub> components.

406

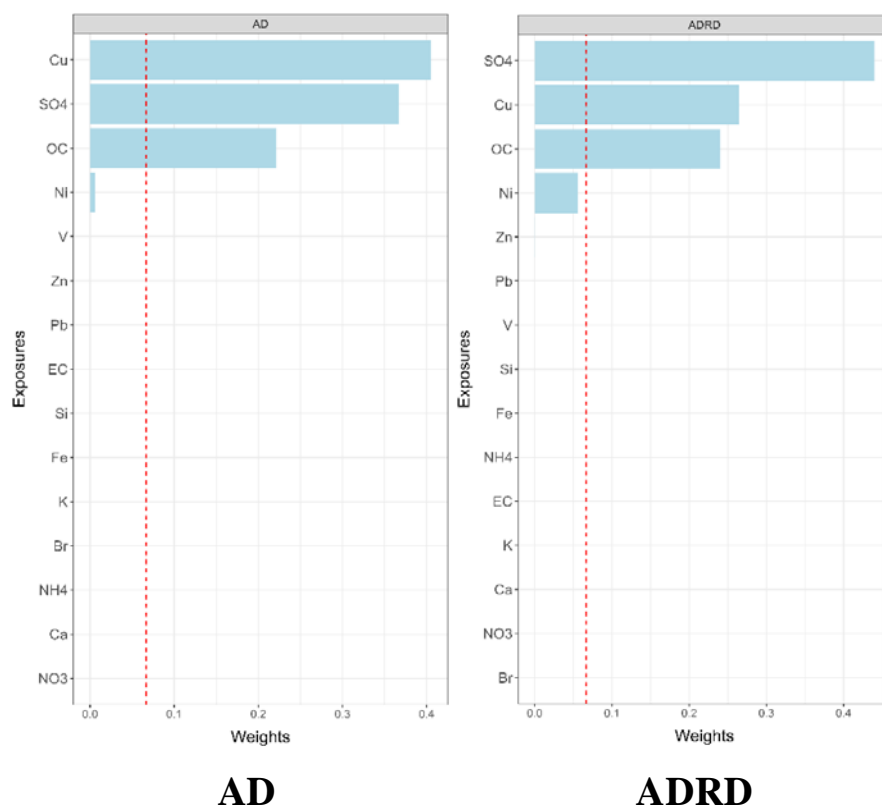

407

408

409

410

## 411 Reference

412

413 1. Wimo A, Seeher K, Cataldi R, Cyhlarova E, Dielemann JL, Frisell O, et al. The worldwide costs of  
414 dementia in 2019. *Alzheimer's & Dementia*. 2023.

415 2. Matthews KA, Xu W, Gaglioti AH, Holt JB, Croft JB, Mack D, et al. Racial and ethnic estimates of  
416 Alzheimer's disease and related dementias in the United States (2015–2060) in adults aged  $\geq 65$  years.  
417 *Alzheimer's & Dementia*. 2019;15(1):17-24.

418 3. Heron M. Deaths: leading causes for 2019. 2021.

419 4. Mortamais M, Gutierrez L-A, de Hoogh K, Chen J, Vienneau D, Carrière I, et al. Long-term exposure to  
420 ambient air pollution and risk of dementia: Results of the prospective Three-City Study. *Environment*  
421 *International*. 2021;148:106376.

422 5. Kriit HK, Forsberg B, Åström DO, Oudin A. Annual dementia incidence and monetary burden attributable  
423 to fine particulate matter (PM<sub>2.5</sub>) exposure in Sweden. *Environmental Health*. 2021;20(1):1-12.

424 6. Lee M, Schwartz J, Wang Y, Dominici F, Zanobetti A. Long-term effect of fine particulate matter on  
425 hospitalization with dementia. *Environmental Pollution*. 2019;254:112926.

426 7. Shi L, Steenland K, Li H, Liu P, Zhang Y, Lyles RH, et al. A national cohort study (2000–2018) of  
427 long-term air pollution exposure and incident dementia in older adults in the United States. *Nature*  
428 *Communications*. 2021;12(1).

429 8. Yang J, Zhou M, Li M, Yin P, Hu J, Zhang C, et al. Fine particulate matter constituents and cause-specific

- 430 mortality in China: a nationwide modelling study. *Environment international*. 2020;143:105927.
- 431 9. Chen J, Rodopoulou S, de Hoogh K, Strak M, Andersen ZJ, Atkinson R, et al. Long-term exposure to fine  
432 particle elemental components and natural and cause-specific mortality—A pooled analysis of eight European  
433 cohorts within the ELAPSE project. *Environmental health perspectives*. 2021;129(4):047009.
- 434 10. Danesh Yazdi M, Amini H, Wei Y, Castro E, Shi L, Schwartz JD. Long-term exposure to PM2.5 species  
435 and all-cause mortality among Medicare patients using mixtures analyses. *Environ Res*. 2024;246:118175.
- 436 11. Du X, Zhang Y, Liu C, Fang J, Zhao F, Chen C, et al. Fine particulate matter constituents and sub-clinical  
437 outcomes of cardiovascular diseases: a multi-center study in China. *Science of the total environment*.  
438 2021;759:143555.
- 439 12. Liu L, Zhang Y, Yang Z, Luo S, Zhang Y. Long-term exposure to fine particulate constituents and  
440 cardiovascular diseases in Chinese adults. *Journal of Hazardous Materials*. 2021;416:126051.
- 441 13. Wu Y, Jin T, He W, Liu L, Li H, Liu C, et al. Associations of fine particulate matter and constituents with  
442 pediatric emergency room visits for respiratory diseases in Shanghai, China. *International Journal of Hygiene  
443 and Environmental Health*. 2021;236:113805.
- 444 14. Yang T, Chen R, Gu X, Xu J, Yang L, Zhao J, et al. Association of fine particulate matter air pollution and  
445 its constituents with lung function: the China pulmonary health study. *Environment International*.  
446 2021;156:106707.
- 447 15. Chung Y, Dominici F, Wang Y, Coull BA, Bell ML. Associations between long-term exposure to chemical  
448 constituents of fine particulate matter (PM2.5) and mortality in Medicare enrollees in the eastern United States.  
449 *Environmental health perspectives*. 2015;123(5):467-74.
- 450 16. Son J-Y, Lee J-T, Kim K-H, Jung K, Bell ML. Characterization of Fine Particulate Matter and Associations  
451 between Particulate Chemical Constituents and Mortality in Seoul, Korea. *Environmental Health Perspectives*.  
452 2012;120(6):872-8.
- 453 17. Chen X-C, Jahn HJ, Engling G, Ward TJ, Kraemer A, Ho K-F, et al. Chemical characterization and sources  
454 of personal exposure to fine particulate matter (PM2.5) in the megacity of Guangzhou, China. *Environmental  
455 Pollution*. 2017;231:871-81.
- 456 18. Bell Michelle L, Dominici F, Ebisu K, Zeger Scott L, Samet Jonathan M. Spatial and Temporal Variation in  
457 PM2.5 Chemical Composition in the United States for Health Effects Studies. *Environmental Health  
458 Perspectives*. 2007;115(7):989-95.
- 459 19. Shi L, Zhu Q, Wang Y, Hao H, Zhang H, Schwartz J, et al. Incident dementia and long-term exposure to  
460 constituents of fine particle air pollution: A national cohort study in the United States. *Proceedings of the  
461 National Academy of Sciences*. 2023;120(1):e2211282119.
- 462 20. Taylor Jr DH, Fillenbaum GG, Ezell ME. The accuracy of medicare claims data in identifying Alzheimer's  
463 disease. *Journal of clinical epidemiology*. 2002;55(9):929-37.
- 464 21. Taylor Jr DH, Østbye T, Langa KM, Weir D, Plassman BL. The accuracy of Medicare claims as an  
465 epidemiological tool: the case of dementia revisited. *Journal of Alzheimer's Disease*. 2009;17(4):807-15.
- 466 22. Amini H, Danesh-Yazdi M, Di Q, Requia W, Wei Y, Abu-Awad Y, et al. Hyperlocal super-learned PM2.5  
467 components across the contiguous US. 2022.
- 468 23. Amini H, Danesh-Yazdi M, Di Q, Requia W, Wei Y, AbuAwad Y, et al. Annual Mean PM2.5 Components  
469 Trace Elements (TEs) 50m Urban and 1km Non-Urban Area Grids for Contiguous U.S., 2000-2019, v1.  
470 Palisades, New York: NASA Socioeconomic Data and Applications Center (SEDAC); 2023.
- 471 24. Amini H, Danesh-Yazdi M, Di Q, Requia W, Wei Y, AbuAwad Y, et al. Annual Mean PM2.5 Components  
472 (EC, NH4, NO3, OC, SO4) 50m Urban and 1km Non-Urban Area Grids for Contiguous U.S., 2000-2019 v1.  
473 Palisades, New York: NASA Socioeconomic Data and Applications Center (SEDAC); 2023.

- 474 25. Di Q, Amini H, Shi L, Kloog I, Silvern R, Kelly J, et al. An ensemble-based model of PM<sub>2.5</sub>  
475 concentration across the contiguous United States with high spatiotemporal resolution. *Environment*  
476 *international*. 2019;130:104909.
- 477 26. Jin T, Amini H, Kosheleva A, Danesh Yazdi M, Wei Y, Castro E, et al. Associations between long-term  
478 exposures to airborne PM<sub>2.5</sub> components and mortality in Massachusetts: mixture analysis exploration.  
479 *Environmental Health*. 2022;21(1):96.
- 480 27. Center for International Earth Science Information Network - CIESIN - Columbia University. Gridded  
481 Population of the World, Version 4 (GPWv4): Population Density, Revision 11. Palisades, New York: NASA  
482 Socioeconomic Data and Applications Center (SEDAC); 2018.
- 483 28. Carrico C, Gennings C, Wheeler DC, Factor-Litvak P. Characterization of weighted quantile sum  
484 regression for highly correlated data in a risk analysis setting. *Journal of agricultural, biological, and*  
485 *environmental statistics*. 2015;20:100-20.
- 486 29. Keil AP, Buckley JP, O'Brien KM, Ferguson KK, Zhao S, White AJ. A quantile-based g-computation  
487 approach to addressing the effects of exposure mixtures. *Environmental health perspectives*.  
488 2020;128(4):047004.
- 489 30. Renzetti S, Curtin P, Just AC, Bello G, Gennings C, Renzetti MS, et al. Package 'gWQS'. 2021.
- 490 31. Keil A, Keil MA. Package 'qgcomp'. 2020.
- 491 32. Carey IM, Anderson HR, Atkinson RW, Beevers SD, Cook DG, Strachan DP, et al. Are noise and air  
492 pollution related to the incidence of dementia? A cohort study in London, England. *BMJ Open*.  
493 2018;8(9):e022404.
- 494 33. Smargiassi A, Sidi EAL, Robert L-E, Plante C, Haddad M, Gamache P, et al. Exposure to ambient air  
495 pollutants and the onset of dementia in Québec, Canada. *Environmental Research*. 2020;190:109870.
- 496 34. Cristaldi A, Fiore M, Oliveri Conti G, Pulvirenti E, Favara C, Grasso A, et al. Possible association between  
497 PM<sub>2.5</sub> and neurodegenerative diseases: A systematic review. *Environmental Research*. 2022;208:112581.
- 498 35. Rhew SH, Kravchenko J, Lyerly HK. Exposure to low-dose ambient fine particulate matter PM<sub>2.5</sub> and  
499 Alzheimer's disease, non-Alzheimer's dementia, and Parkinson's disease in North Carolina. *PloS one*.  
500 2021;16(7):e0253253.
- 501 36. You R, Ho Y-S, Chang RC-C. The pathogenic effects of particulate matter on neurodegeneration: a review.  
502 *Journal of Biomedical Science*. 2022;29(1):15.
- 503 37. Huang X, Liu Z, Ge Y, Li Q, Wang X, Fu H, et al. Aerosol high water contents favor sulfate and secondary  
504 organic aerosol formation from fossil fuel combustion emissions. *npj Climate and Atmospheric Science*.  
505 2023;6(1):173.
- 506 38. Ding X, Li Q, Wu D, Wang X, Li M, Wang T, et al. Direct observation of sulfate explosive growth in wet  
507 plumes emitted from typical coal-fired stationary sources. *Geophysical Research Letters*.  
508 2021;48(6):e2020GL092071.
- 509 39. Khan A, Kanwal H, Bibi S, Mushtaq S, Khan A, Khan YH, et al. Volatile Organic Compounds and  
510 Neurological Disorders: From Exposure to Preventive Interventions. In: Akash MSH, Rehman K, editors.  
511 *Environmental Contaminants and Neurological Disorders*. Cham: Springer International Publishing; 2021. p.  
512 201-30.
- 513 40. Saarikoski S, Timonen H, Saarnio K, Aurela M, Järvi L, Keronen P, et al. Sources of organic carbon in fine  
514 particulate matter in northern European urban air. *Atmos Chem Phys*. 2008;8(20):6281-95.
- 515 41. Kodavanti PRS. Neurotoxicity of persistent organic pollutants: possible mode (s) of action and further  
516 considerations. *Dose-response*. 2005;3(3):dose-response. 003.03. 2.
- 517 42. Tang Y, Donnelly K, Tiffany-Castiglioni E, Mumtaz M. Neurotoxicity of polycyclic aromatic hydrocarbons

- 518 and simple chemical mixtures. *Journal of Toxicology and Environmental Health Part A*. 2003;66(10):919-40.
- 519 43. Mathys ZK, White AR. Copper and Alzheimer's disease. *Neurotoxicity of Metals*. 2017:199-216.
- 520 44. Bulcke F, Dringen R, Scheiber IF. Neurotoxicity of Copper. In: Aschner M, Costa LG, editors.
- 521 *Neurotoxicity of Metals*. Cham: Springer International Publishing; 2017. p. 313-43.
- 522 45. Scheiber IF, Mercer JFB, Dringen R. Metabolism and functions of copper in brain. *Progress in*
- 523 *Neurobiology*. 2014;116:33-57.
- 524 46. Zecca L, Youdim MB, Riederer P, Connor JR, Crichton RR. Iron, brain ageing and neurodegenerative
- 525 disorders. *Nature Reviews Neuroscience*. 2004;5(11):863-73.
- 526 47. Connor J, Snyder B, Beard J, Fine R, Mufson E. Regional distribution of iron and iron-regulatory proteins
- 527 in the brain in aging and Alzheimer's disease. *Journal of neuroscience research*. 1992;31(2):327-35.
- 528 48. Lane DJ, Ayton S, Bush AI. Iron and Alzheimer's disease: an update on emerging mechanisms. *Journal of*
- 529 *Alzheimer's Disease*. 2018;64(s1):S379-S95.
- 530 49. Telling ND, Everett J, Collingwood JF, Dobson J, van der Laan G, Gallagher JJ, et al. Iron biochemistry is
- 531 correlated with amyloid plaque morphology in an established mouse model of Alzheimer's disease. *Cell*
- 532 *chemical biology*. 2017;24(10):1205-15. e3.
- 533 50. Yamamoto A, Shin RW, Hasegawa K, Naiki H, Sato H, Yoshimasu F, et al. Iron (III) induces aggregation
- 534 of hyperphosphorylated  $\tau$  and its reduction to iron (II) reverses the aggregation: implications in the formation of
- 535 neurofibrillary tangles of Alzheimer's disease. *Journal of neurochemistry*. 2002;82(5):1137-47.
- 536 51. Wang B, Fang T, Chen H. Zinc and central nervous system disorders. *Nutrients*. 2023;15(9):2140.
- 537 52. Brewer GJ, Kanzer SH, Zimmerman EA, Molho ES, Celmins DF, Heckman SM, et al. Subclinical zinc
- 538 deficiency in Alzheimer's disease and Parkinson's disease. *American Journal of Alzheimer's Disease & Other*
- 539 *Dementias*. 2010;25(7):572-5.
- 540 53. Mocchegiani E, Bertoni-Freddari C, Marcellini F, Malavolta M. Brain, aging and neurodegeneration: role
- 541 of zinc ion availability. *Progress in neurobiology*. 2005;75(6):367-90.
- 542 54. Grigoratos T, Martini G. Brake wear particle emissions: a review. *Environmental science and pollution*
- 543 *research*. 2015;22:2491-504.
- 544 55. Lopez B, Wang X, Chen L-WA, Ma T, Mendez-Jimenez D, Cobb LC, et al. Metal contents and size
- 545 distributions of brake and tire wear particles dispersed in the near-road environment. *Science of The Total*
- 546 *Environment*. 2023;883:163561.
- 547 56. Habre R, Girguis M, Urman R, Fruin S, Lurmann F, Shafer M, et al. Contribution of tailpipe and
- 548 non-tailpipe traffic sources to quasi-ultrafine, fine and coarse particulate matter in southern California. *Journal*
- 549 *of the Air & Waste Management Association*. 2021;71(2):209-30.
- 550 57. Copper-Free Brake Initiative: U.S. Environmental Protection Agency
- 551 2015 [updated 08/30/2024. Available from: <https://www.epa.gov/npdes/copper-free-brake-initiative>.
- 552
